# Supplementary material for: NPFFR2-deficient mice fed a high-fat diet develop strong intolerance to glucose
Source: Oxford University Press journal article supplement (doi:10.1042/cs20220880), 2023-05-01
Supplement: cs-2022-0880_supp.pdf [file cs-2022-0880_supp.pdf]

## Supplementary data

**Supplementary Table 1. List of tested genes of interest in different tissues**

| Gene                                                                                                      | BAT | scWAT | gWAT | liver |
|-----------------------------------------------------------------------------------------------------------|-----|-------|------|-------|
| acetyl-CoA carboxylase 1 ( <i>Acaca</i> )                                                                 |     | X     | X    | X     |
| adiponectin                                                                                               |     | X     | X    |       |
| adrenoreceptor 3 $\beta$ ( <i>Adr3b</i> )                                                                 | X   | X     | X    |       |
| 3-hydroxybutyrate dehydrogenase 1 ( <i>Bdh1</i> )                                                         |     |       |      | X     |
| carbohydrate-responsive element-binding protein ( <i>Chrebp</i> )                                         |     | X     | X    |       |
| carnitine palmitoyltransferase 1A ( <i>Cpt1a</i> )                                                        |     | X     | X    | X     |
| fatty acid synthase ( <i>Fasn</i> )                                                                       |     | X     | X    |       |
| fibroblast growth factor 21 ( <i>Fgf21</i> )                                                              |     |       |      | X     |
| glucose transporter type 4 ( <i>Glut4</i> )                                                               |     | X     | X    |       |
| glycogen synthase kinase-3 $\beta$ ( <i>Gsk3<math>\beta</math></i> )                                      |     |       |      | X     |
| 3-hydroxy-3-methylglutaryl-CoA lyase ( <i>Hmgcl</i> )                                                     |     |       |      | X     |
| 3-hydroxy-3-methylglutaryl-CoA synthase 1 ( <i>Hmgcs1</i> )                                               |     |       |      | X     |
| insulin receptor substrate 1 ( <i>Irs1</i> )                                                              |     | X     | X    | X     |
| insulin receptor substrate 2 ( <i>Irs2</i> )                                                              |     | X     | X    | X     |
| lipase E, hormone sensitive type ( <i>Lipe</i> )                                                          |     | X     | X    |       |
| patatin like phospholipase domain containing 2 ( <i>Pnpla2</i> )                                          |     | X     | X    |       |
| peroxisome proliferator-activated receptor alpha ( <i>Ppara</i> )                                         |     |       |      | X     |
| peroxisome proliferator-activated receptor gamma ( <i>Ppar<math>\gamma</math></i> )                       |     | X     | X    |       |
| peroxisome proliferator activator receptor gamma coactivator 1 alpha ( <i>Ppar<math>\gamma</math>1a</i> ) | X   | X     | X    | X     |
| PR/SET domain 16 ( <i>Prdm16</i> )                                                                        | X   |       |      |       |
| stearoyl-CoA desaturase 1 ( <i>Scd1</i> )                                                                 |     | X     | X    | X     |
| sterol regulatory element-binding transcription factor 1 ( <i>Srebp1</i> )                                |     | X     | X    |       |
| uncoupling protein 1 ( <i>Ucp1</i> )                                                                      | X   |       |      |       |
| vascular endothelial growth factor alpha ( <i>Vegfa</i> )                                                 | X   |       |      |       |
| tumor necrosis factor alpha ( <i>TNFA</i> )                                                               | X   | X     | X    |       |

**Supplementary Table 2. List of used primary antibodies**

| <b>Abbreviation</b>                 | <b>Antibody</b>                                   | <b>MW<br/>kDa</b> | <b>Dilution</b> | <b>Provider</b>               |
|-------------------------------------|---------------------------------------------------|-------------------|-----------------|-------------------------------|
| <b>p-Akt S473</b>                   | Phospho-Akt (Ser473) (D9E) XP® Rabbit mAb #4060   | 60                | 1:1000          | Cell Signaling Technology     |
| <b>Akt</b>                          | Akt (pan) (C67E7) Rabbit mAb #4691                | 60                | 1:1000          | Cell Signaling Technology     |
| <b>p-AS160 S588</b>                 | Phospho-AS160 (Ser588) (D8E4) Rabbit mAb #8730    | 160               | 1:1000          | Cell Signaling Technology     |
| <b>AS160</b>                        | AS160 (C69A7) Rabbit mAb #2670                    | 160               | 1:1000          | Cell Signaling Technology     |
| <b>GAPDH</b>                        | GAPDH (D4C6R) Mouse mAb #97166                    | 37                | 1:1000          | Cell Signaling Technology     |
| <b>JNK</b>                          | SAPK/JNK Antibody Rabbit #9252                    | 46, 54            | 1:1000          | Cell Signaling Technology     |
| <b>p-PDK</b>                        | Phospho-PDK1 (Ser241) (C49H2) Rabbit mAb #3438    | 58-68             | 1:0000          | Cell Signaling Technology     |
| <b>PDK</b>                          | PDK1 Antibody Rabbit Ab #3062                     | 58-68             | 1:0000          | Cell Signaling Technology     |
| <b>PI3K p85</b>                     | PI3 Kinase p85 (19H8) Rabbit mAb #4257            | 85                | 1:1000          | Cell Signaling Technology     |
| <b>PI3K p110<math>\alpha</math></b> | PI3 Kinase p110 $\alpha$ (C73F8) Rabbit mAb #4249 | 110               | 1:1000          | Cell Signaling Technology     |
| <b>PPAR<math>\alpha</math></b>      | PPA $\alpha$ Polyclonal Rabbit Ab #PA1-822A       | 52                | 1:1000          | Thermo Fisher Scientific Inc. |

**Supplementary Table 3. Morphometric analysis in NPFFR2 KO and WT mice at 26 weeks and plasma metabolic profile at 24 weeks**

| group                       | BW [g]                | BAT [g]         | scWAT [g]            | gWAT [g]             | liver [g]       | TAG             | FFA         | cholesterol     | leptin                |
|-----------------------------|-----------------------|-----------------|----------------------|----------------------|-----------------|-----------------|-------------|-----------------|-----------------------|
| <b>WT male STD</b>          | 29.96 ± 0.32          | 0.11 ± 0.01     | 0.24 ± 0.02          | 0.40 ± 0.02          | 1.33 ± 0.05     | 0.45 ± 0.02     | 0.73 ± 0.10 | 1.95 ± 0.12     | 1.85 ± 0.30           |
| <b>NPFFR2 KO male STD</b>   | 30.34 ± 0.63          | 0.14 ± 0.01     | 0.30 ± 0.02          | 0.47 ± 0.06          | 1.38 ± 0.05     | 0.43 ± 0.03     | 0.57 ± 0.06 | 1.89 ± 0.12     | 2.92 ± 0.78           |
| <b>WT male HFD</b>          | 51.33 ± 0.43 ###      | 0.33 ± 0.02 ### | 2.17 ± 0.12 ###      | 2.30 ± 0.12 ###      | 1.79 ± 0.05 ### | 0.54 ± 0.04     | 0.60 ± 0.04 | 3.98 ± 0.07 ### | 44.85 ± 1.61 ###      |
| <b>NPFFR2 KO male HFD</b>   | 44.65 ± 0.77 ###, *** | 0.35 ± 0.03 ### | 1.39 ± 0.10 ###, *** | 1.87 ± 0.06 ###, *** | 1.51 ± 0.08 **  | 0.55 ± 0.04 #   | 0.61 ± 0.06 | 3.87 ± 0.18 ### | 30.14 ± 1.84 ###, *** |
| <b>WT female STD</b>        | 24.55 ± 0.19          | 0.08 ± 0.01     | 0.18 ± 0.02          | 0.22 ± 0.03          | 1.10 ± 0.01     | 0.45 ± 0.03     | 0.47 ± 0.06 | 3.36 ± 0.21     | 1.11 ± 0.09           |
| <b>NPFFR2 KO female STD</b> | 24.34 ± 0.19          | 0.09 ± 0.01     | 0.25 ± 0.03          | 0.30 ± 0.03          | 1.02 ± 0.03     | 0.35 ± 0.01 *   | 0.44 ± 0.04 | 2.17 ± 0.18 **  | 2.55 ± 0.52           |
| <b>WT female HFD</b>        | 42.44 ± 1.18 ###      | 0.21 ± 0.02 ### | 1.98 ± 0.16 ###      | 2.99 ± 0.19 ###      | 1.28 ± 0.07     | 0.58 ± 0.02 ##  | 0.39 ± 0.03 | 5.49 ± 0.23 ### | 44.12 ± 3.59 ###      |
| <b>NPFFR2 KO female HFD</b> | 45.55 ± 1.22 ###      | 0.26 ± 0.02 ### | 2.15 ± 0.17 ###      | 3.27 ± 0.18 ###      | 1.46 ± 0.10 ### | 0.51 ± 0.04 ### | 0.38 ± 0.04 | 6.14 ± 0.28 ### | 51.00 ± 3.89 ###      |

A morphometric analysis was performed on NPFFR2 KO and WT mice at the end of the experiment, which took place at 26 weeks of age. Additionally, a plasma metabolic profile was assessed at 24 weeks of age. Data are expressed as mean ± SEM (n = 8-10), as determined by One-way ANOVA with Bonferroni post hoc test. Significance is \* p < 0.05, \*\* p < 0.01, \*\*\* p < 0.001 NPFFR2 KO vs WT mice on the same diet, # p < 0.05, ## p < 0.01, ### p < 0.001 HFD vs STD of the same genotype. Body weight (BW), interscapular brown adipose tissue (BAT), subcutaneous white adipose tissue (scWAT), gonadal white adipose tissue (gWAT), triglycerides (TAG), free fatty acids (FFA).

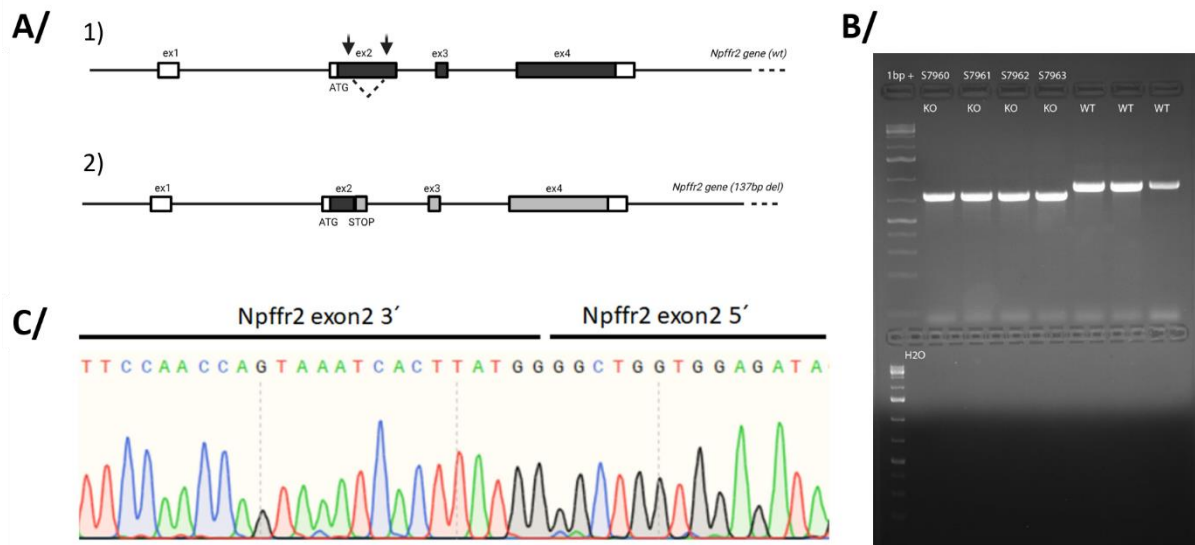

### Supplementary Figure 1. Deletion in *Npffr2* coding sequence

Schematic representation of the *Npffr2* gene targeting strategy (**A**). The wild-type mouse *Npffr2* gene locus. Intronic regions are represented as lines, protein-coding exons as black boxes, and untranslated regions as white boxes. The gRNA target sites are marked with black arrows (**1**). Schematics of *Npffr2* gene structure after CRISPR-mediated gene targeting in the selected founder line. A 137 bp deletion within exon 2 of *Npffr2* leads to a frameshift and generation of a premature STOP codon located in exon 2. This rearrangement results in the elimination of the vast majority of the *Npffr2* protein-coding sequence (grey box) (**2**). Gel showing deletion in G1 animals S7960, 61, 62 and 63 and WT animals at 137bp using primers *Npffr2*-F and R (**B**). Sanger sequencing of the CRISPR target site performed in G1 mouse derived from the founder carrying 137 bp deletion in exon2 of *Npffr2* gene (**C**).

## BAT

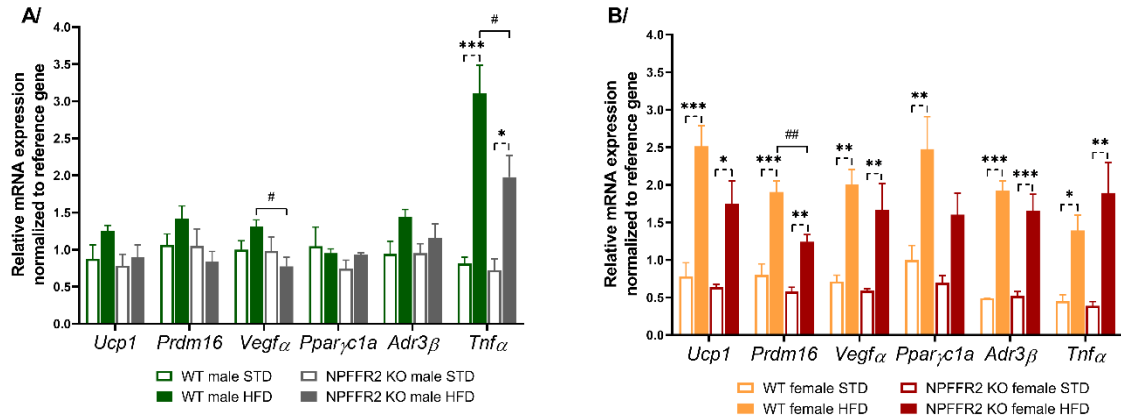

### Supplementary Figure 2. Changes in the mRNA expression in the BAT of NPFFR2 KO and WT mice

mRNA expression of *Ucp1*, *Prdm16*, *Vegfa*, *Pparγ1a*, *Adr3β*, and *Tnfa* in the BAT of males (A) and females (B). Data are expressed as the mean ± SEM (n = 5). Significance was determined by one-way ANOVA with Bonferroni post hoc test. \* p < 0.05, \*\* p < 0.01, and \*\*\* p < 0.001 for HFD vs. STD mice of the same genotype; # p < 0.05 and ## p < 0.01 for NPFFR2 KO vs. WT mice on the same diet.

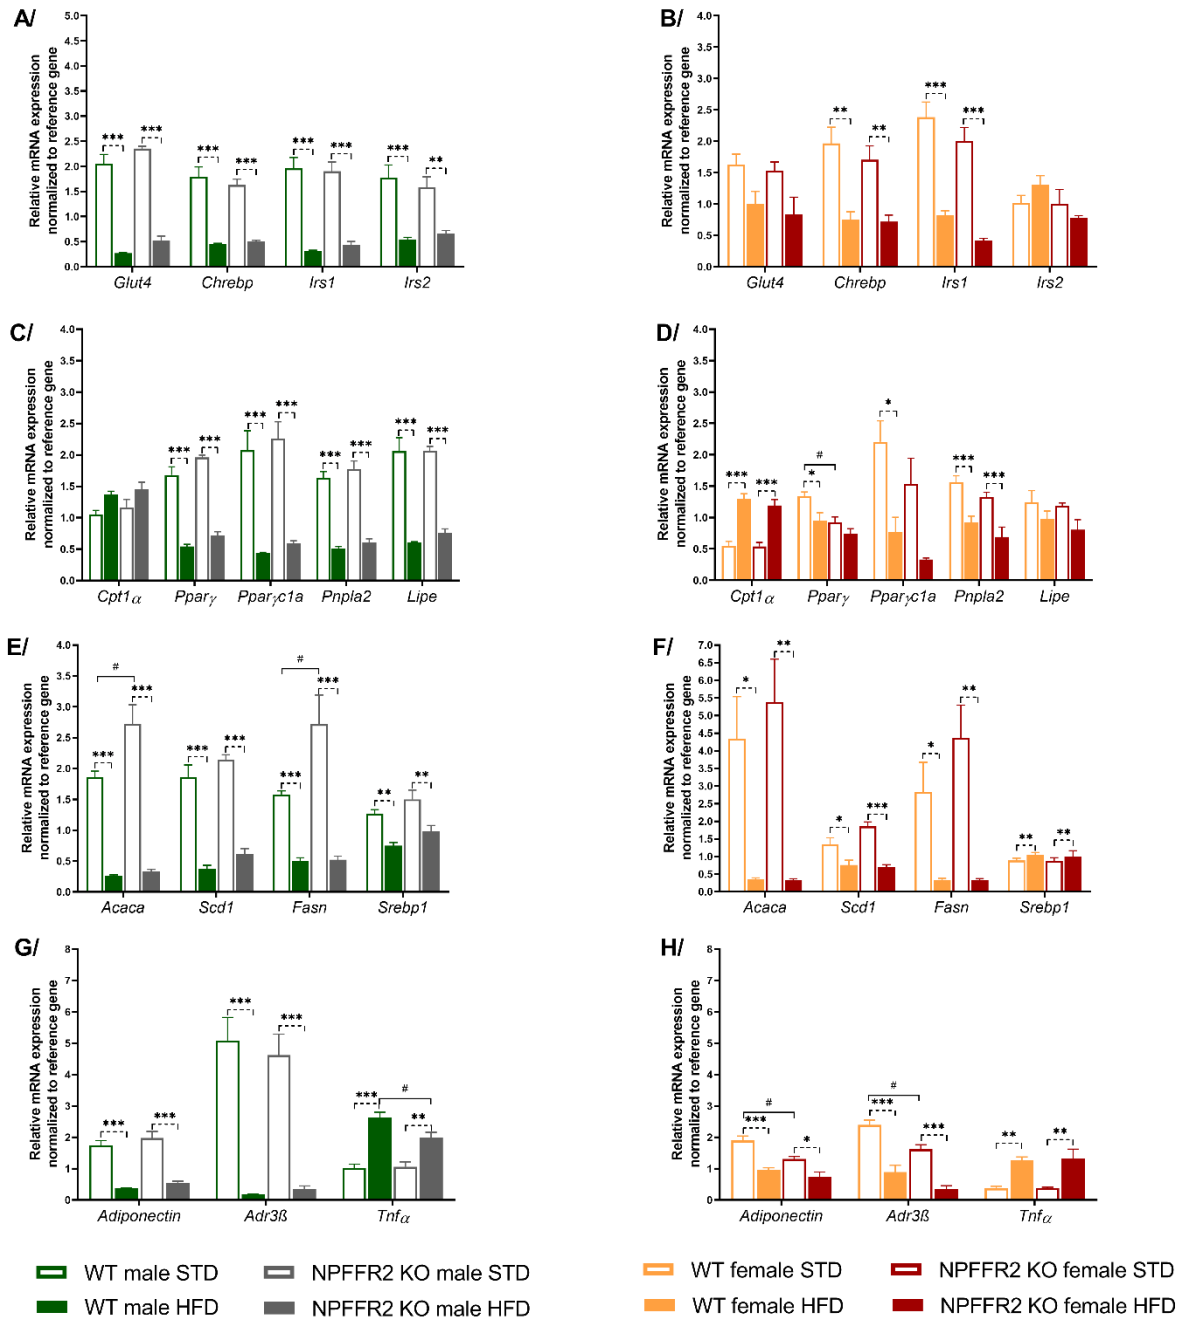

### Supplementary Figure 3. Changes in mRNA expression in the gWAT of NPFFR2 KO and WT mice

mRNA expression of genes involved in glucose metabolism in the gWAT in (A) males and (B) females. mRNA expression of genes involved in lipid metabolism in the gWAT in (C, E) males and (D, F) females. mRNA expression of *adiponectin*, *Adr3β*, and *Tnfa* in (G) males and (H) females. Data are expressed as the mean  $\pm$  SEM (n = 4–5). Significance was determined by one-way ANOVA with Bonferroni post hoc test. \* p < 0.05, \*\* p < 0.01, and \*\*\* p < 0.001 for HFD vs. STD mice of the same genotype; # p < 0.05 for NPFFR2 KO vs. WT mice on the same diet.

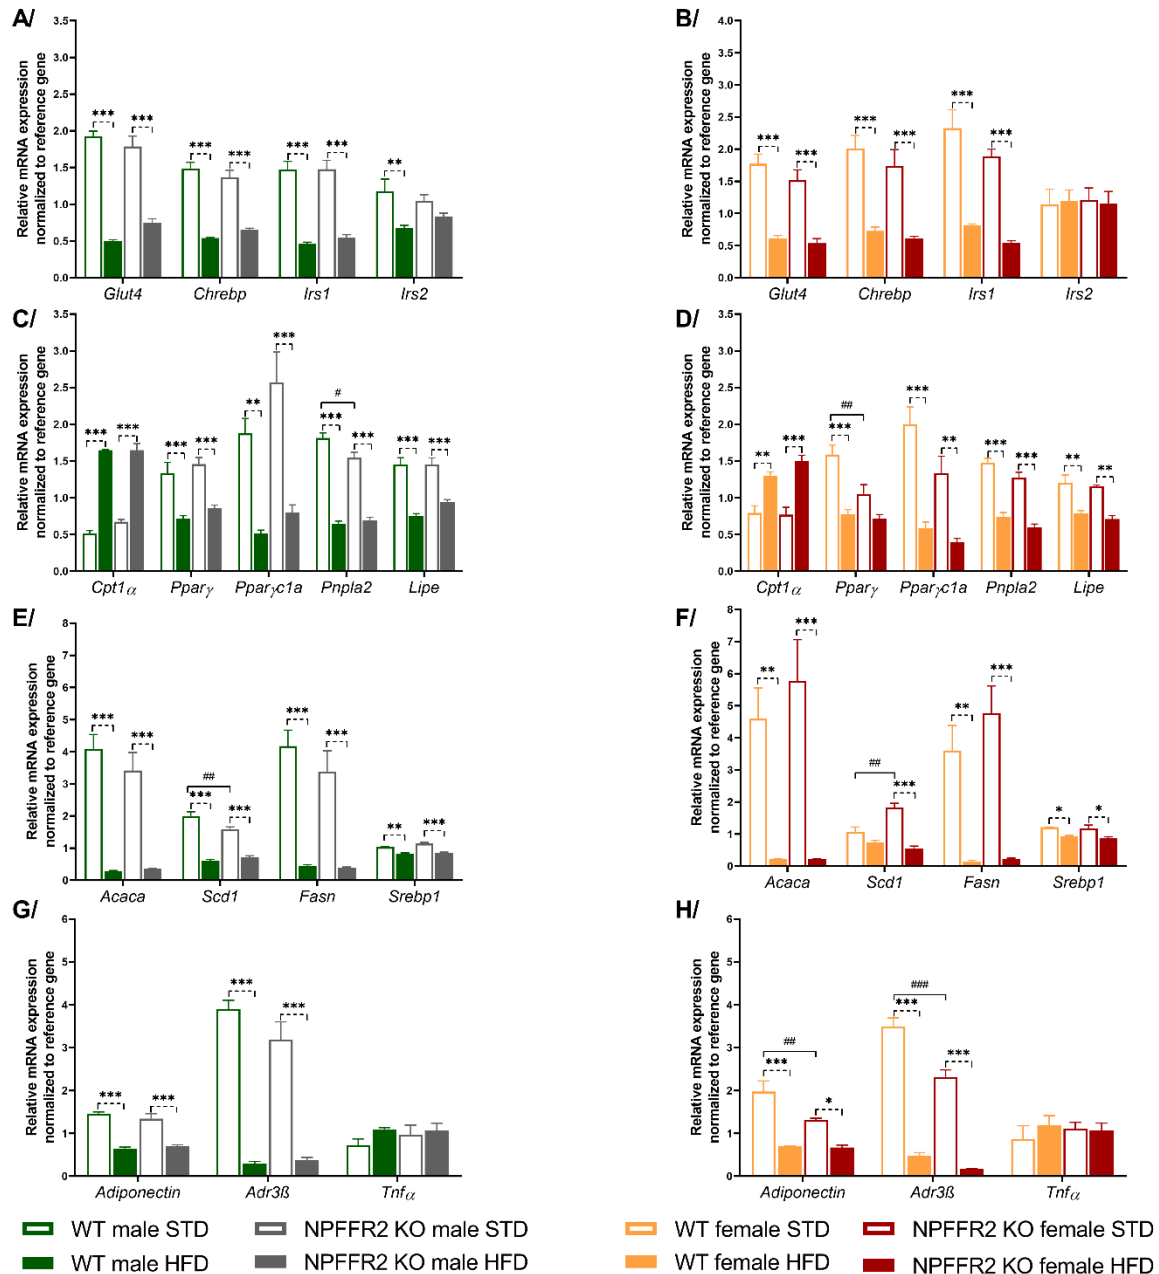

**Supplementary Figure 4. Changes in the mRNA expression in the scWAT of NPFFR2 KO and WT mice**

mRNA expression of genes involved in glucose metabolism in the scWAT in (A)males and (B) females. mRNA expression of genes involved in lipid metabolism in the scWAT in (C, E)males and (D, F) females. mRNA expression of *adiponectin*, *Adr3β*, and *Tnfa* in the scWAT in (G)males and (H) females. Data are expressed as the mean ± SEM (n = 4–5). Significance was determined by one-way ANOVA with Bonferroni post hoc test. \* p < 0.05, \*\* p < 0.01, and \*\*\* p < 0.001 for HFD vs. STD mice of the same genotype; # p < 0.05, ## p < 0.01, and ### p < 0.001 for NPFFR2 KO vs. WT mice on the same diet.

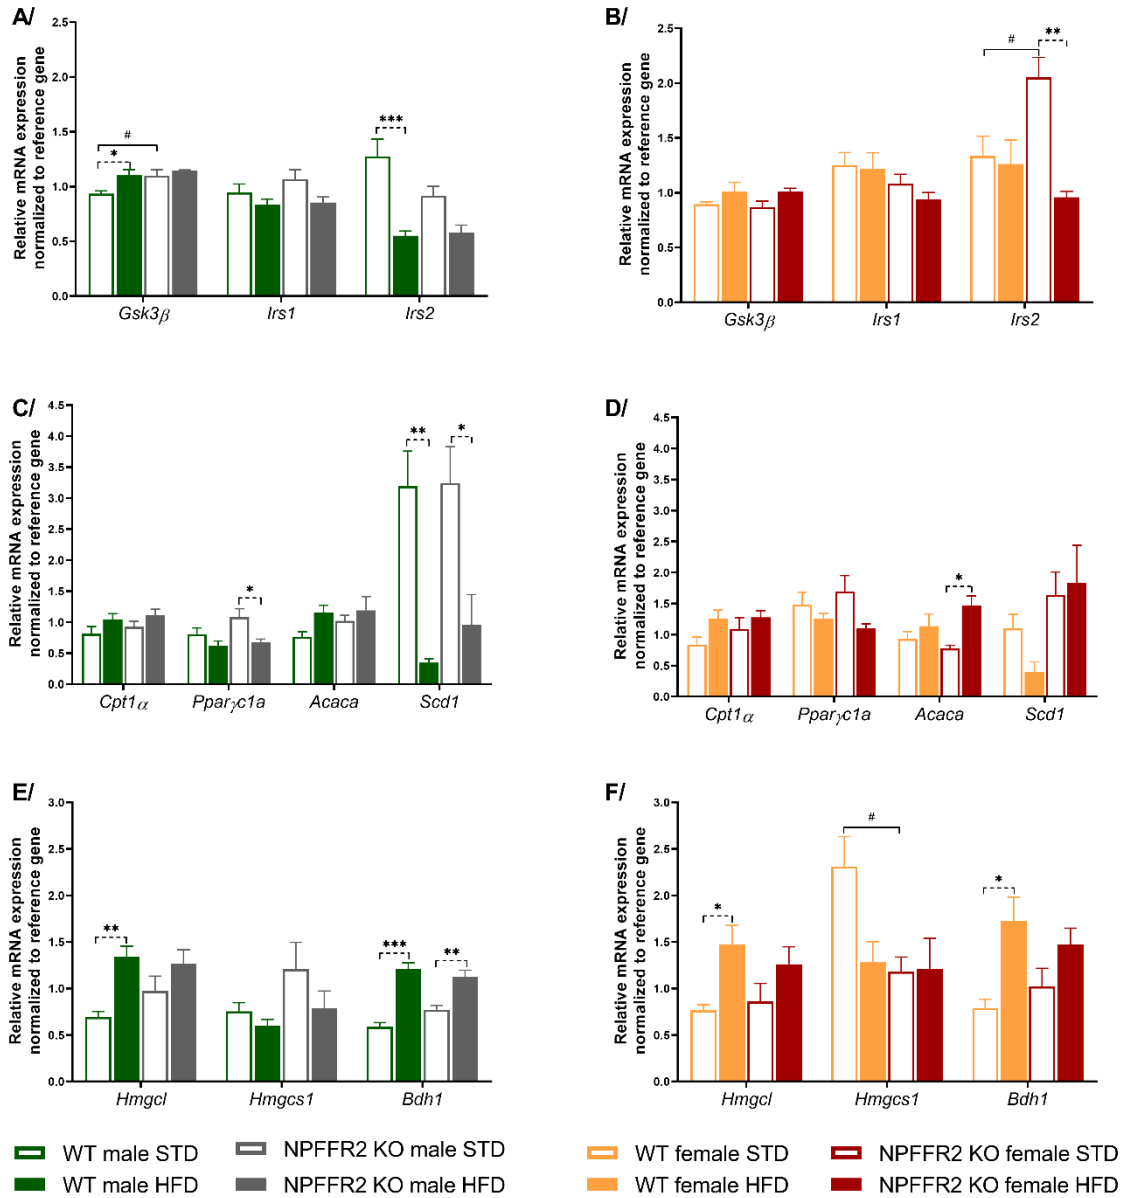

### Supplementary Figure 5. Changes in mRNA expression in the livers of NPFFR2 KO and WT mice

mRNA expression of genes involved in glucose metabolism in the liver in (A) males and (B) females. mRNA expression of genes involved in lipid metabolism in the liver in (C) males and (D) females. mRNA expression of genes involved in ketogenesis in the liver in (E) males and (F) females. mRNA expression of *Fgf21* in the liver in (G) males and (H) females. Data are expressed as the mean  $\pm$  SEM (n = 5). Significance was determined by one-way ANOVA with Bonferroni post hoc test. \* p < 0.05, \*\* p < 0.01, and \*\*\* p < 0.001 for HFD vs. STD mice of the same genotype; # p < 0.05 for NPFFR2 KO vs. WT mice on the same diet.



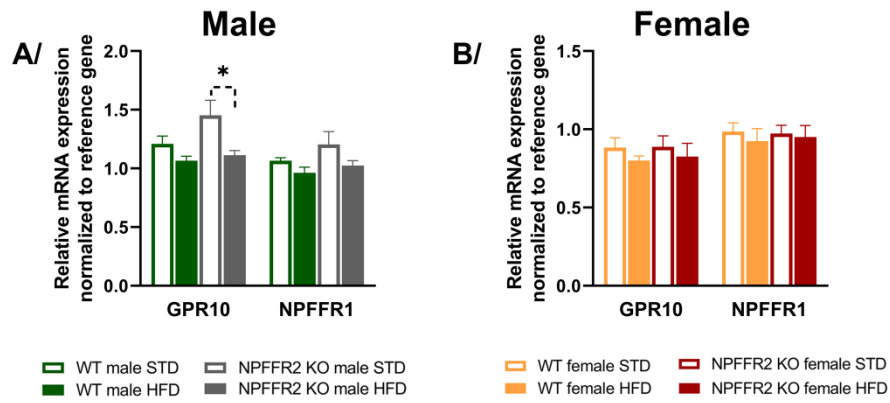

**Supplementary Figure 6. Changes in mRNA expression in the hypothalamus of NPFFR2 KO and WT mice.** mRNA expression of genes for GPR10 and NPFFR1 in (A) males and (B) females. Data are expressed as the mean  $\pm$  SEM (n = 5). Significance was determined by one-way ANOVA with Bonferroni post hoc test. \*  $p < 0.05$  for HFD vs. STD mice of the same genotype.

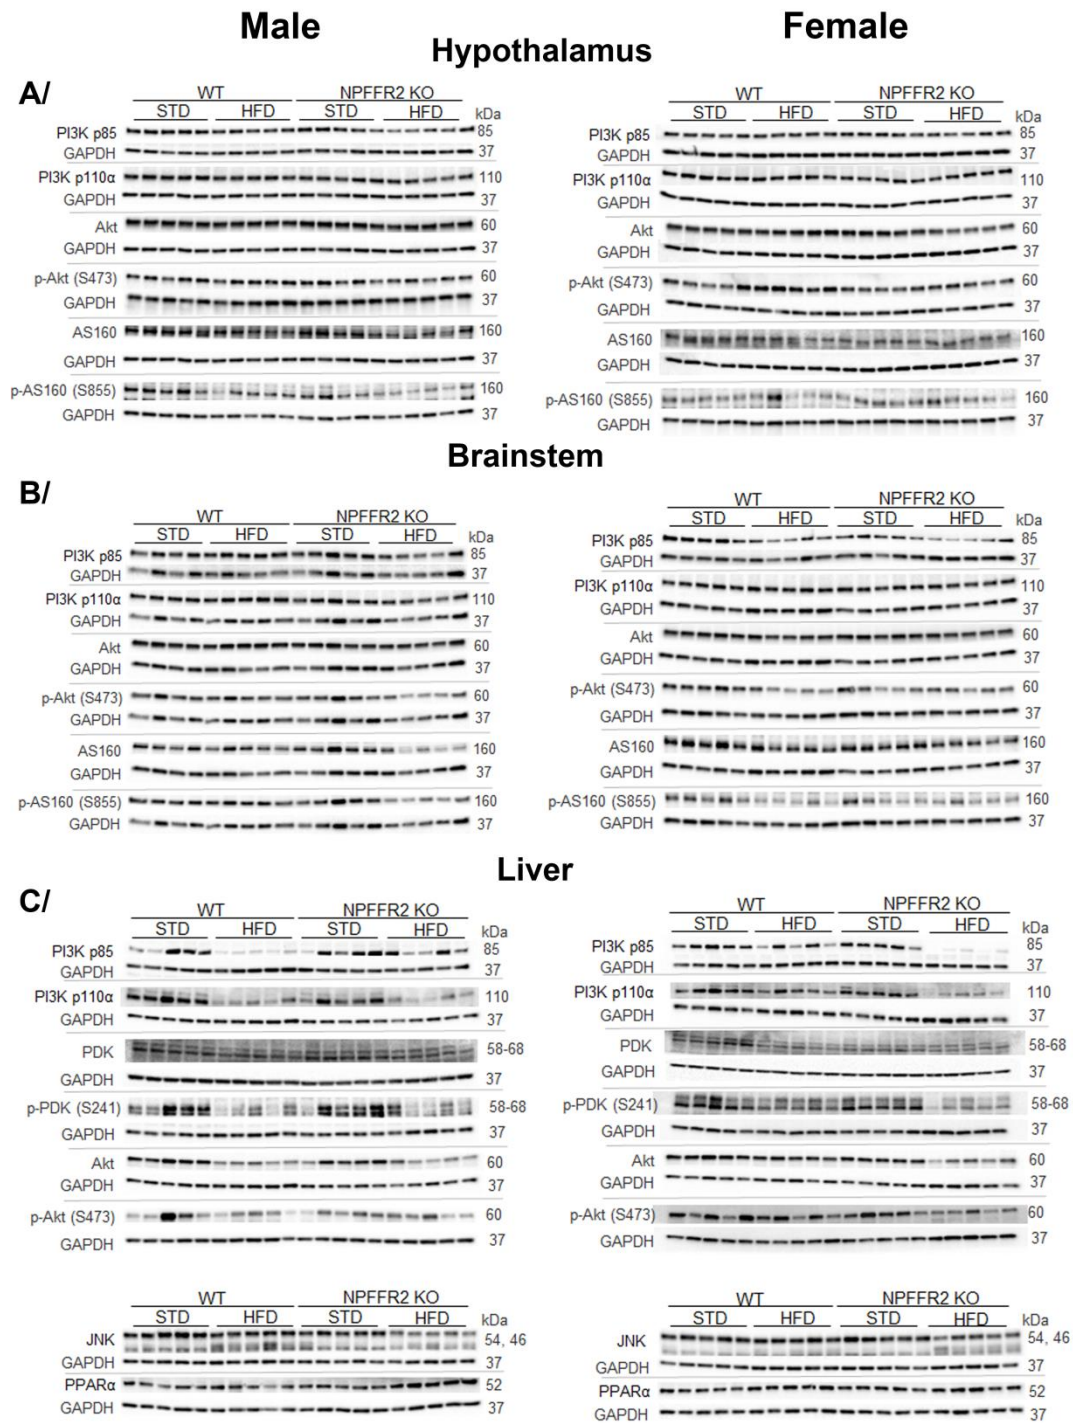

**Supplementary Figure 7. Overview of Western Blot analyses from Figures 5, 6 and 7.**

WB analysis of hypothalamic (A), brainstem (B) and liver (C) signaling including control protein (GAPDH).
